# Supplementary material for: Dual gradients of light intensity and nutrient concentration for full-factorial mapping of photosynthetic productivity
Source: Royal Society of Chemistry journal article supplement (doi:10.1039/c6lc00619a), 2016-01-01

## Lab on a Chip

### Supplementary Information

**Supplementary Figure 1:** Raw images of cell-laden hydrogel after 48 hours of growth showing (a) chlorophyll fluorescence (b) BODIPY 493/503 stained lipid bodies

(a)

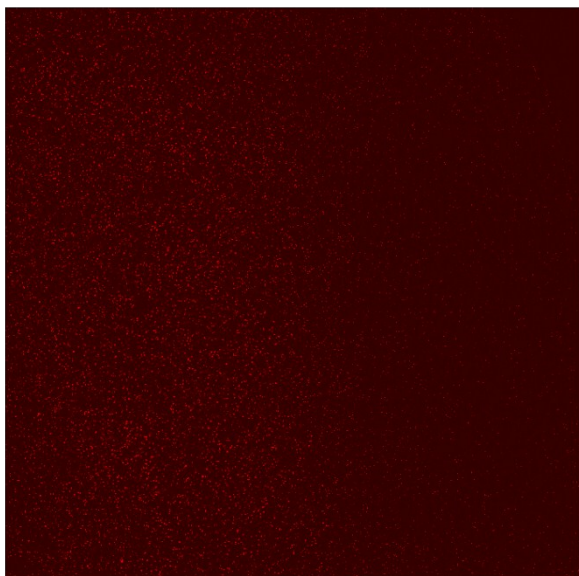

(b)

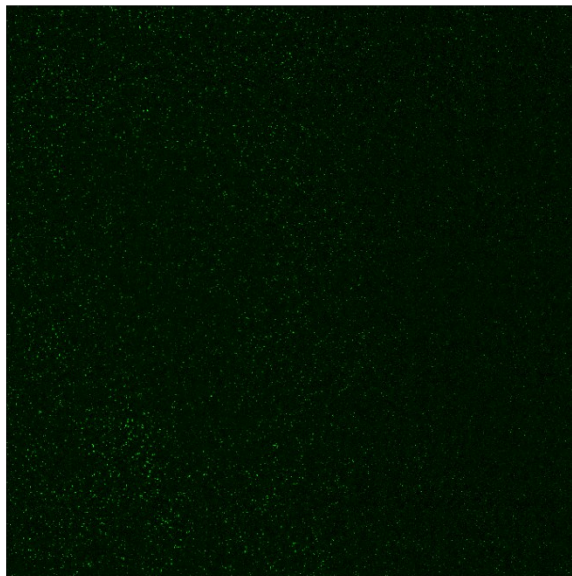

**Supplementary Figure 2:** Fluorescein characterization of gradient generator at approximately 100hrs. Note that the diffusion coefficient of fluorescein is approximately a quarter of that of ammonium.

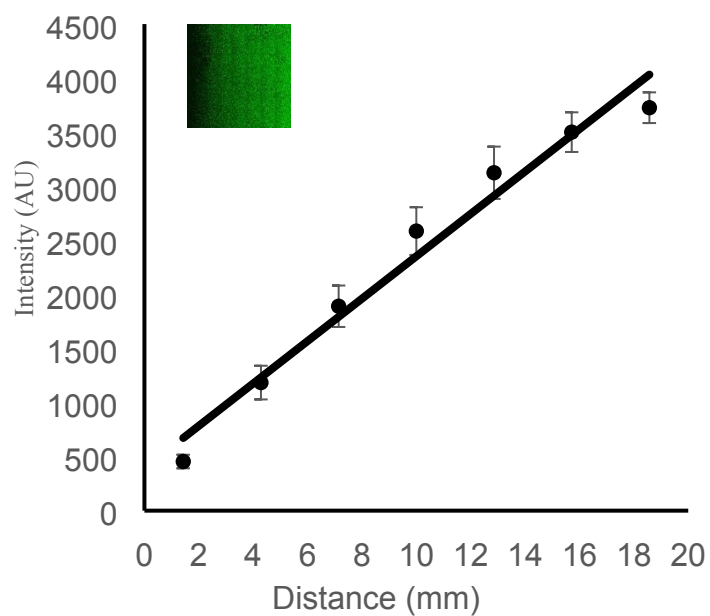

**Supplementary Figure 3:** Light Intensity dependence of pixel value. This curve is used to select the appropriate pixel value to obtain the desired light intensity.

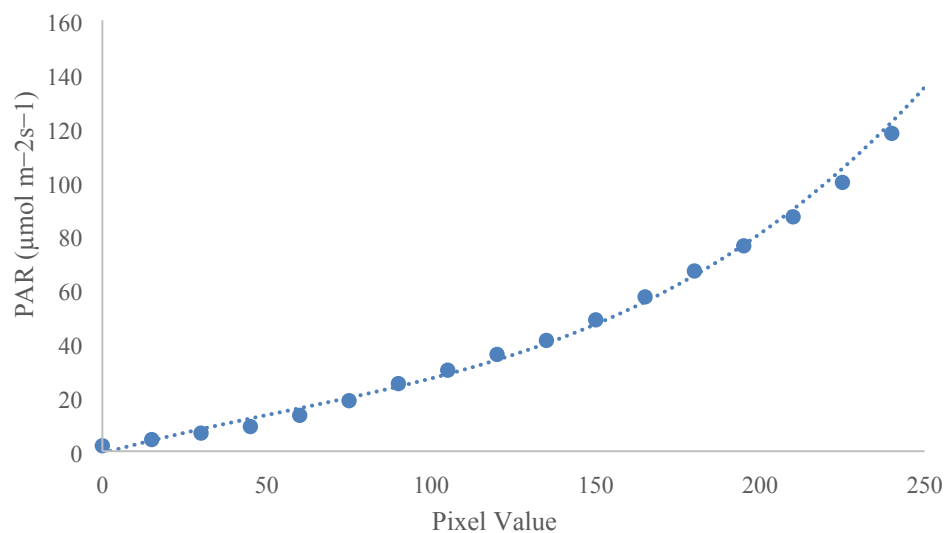

Calculations for diffusion time:

$$t \approx \frac{x^2}{2D} = \frac{(20\text{cm})^2}{2\left(\frac{\sim 2\text{cm}^2 \times 10^{-5}}{\text{s}}\right)} \approx 28 \text{ hours}$$

Supplementary Figure 4: Smoothed growth data.

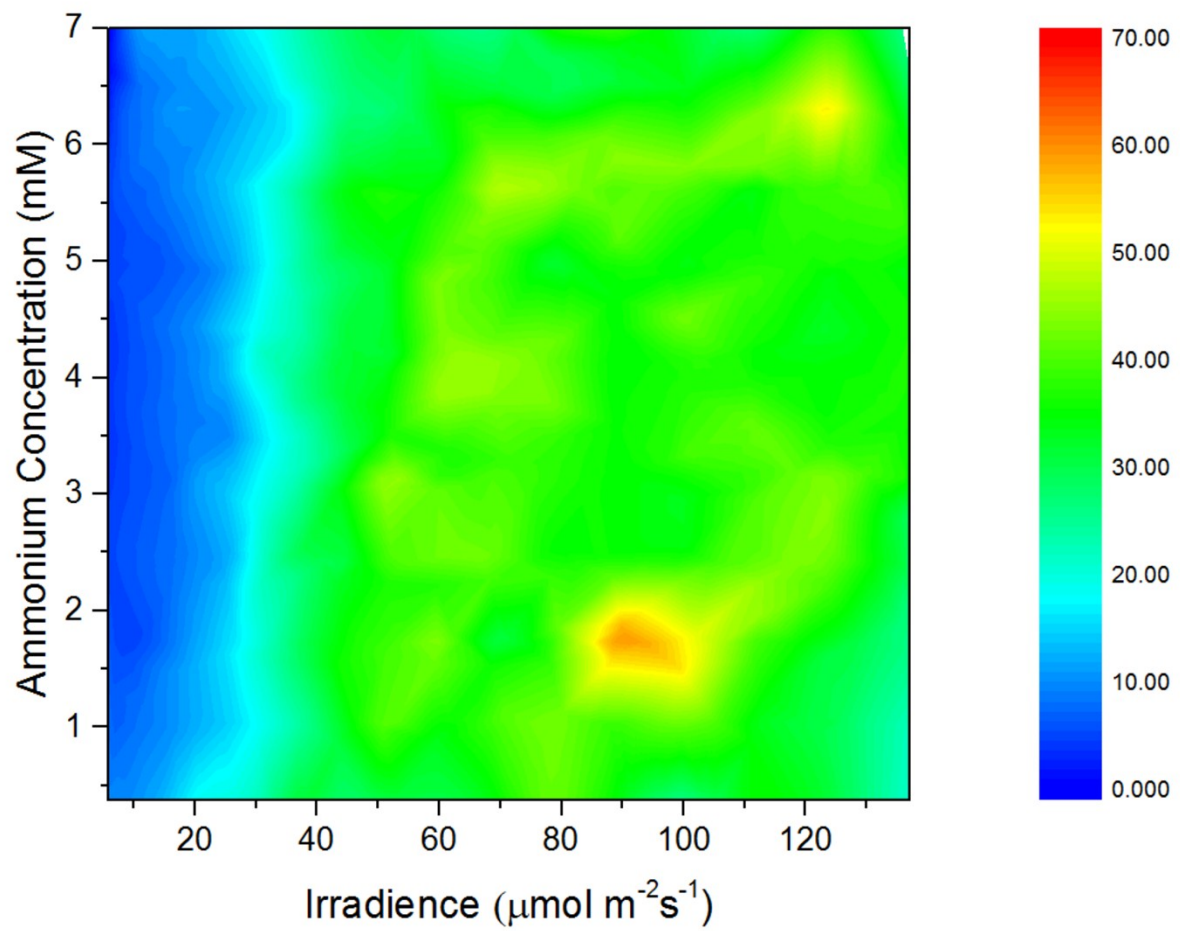

Supplement: c6lc00619a1.pdf [file c6lc00619a1.pdf]
